# Supplementary material
Source: ML conference proceedings conference paper supplement (https://openreview.net/forum?id=qxcQqFUTIpQ)

Error

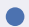

SCClip

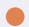

Median

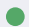

TM

0

$1/\gamma^2$

$\delta$

$\delta/\gamma^2$

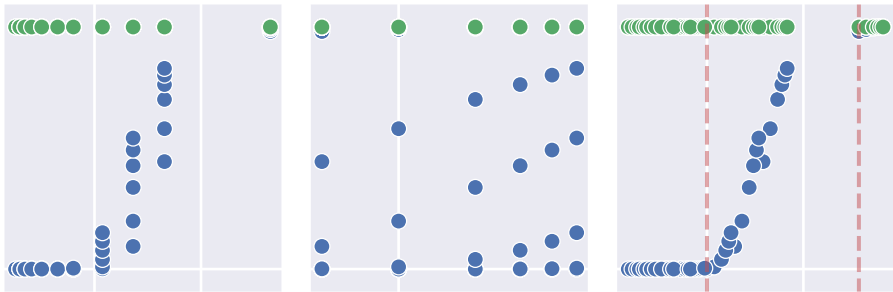

Supplement: supplementary_material [file attachment]

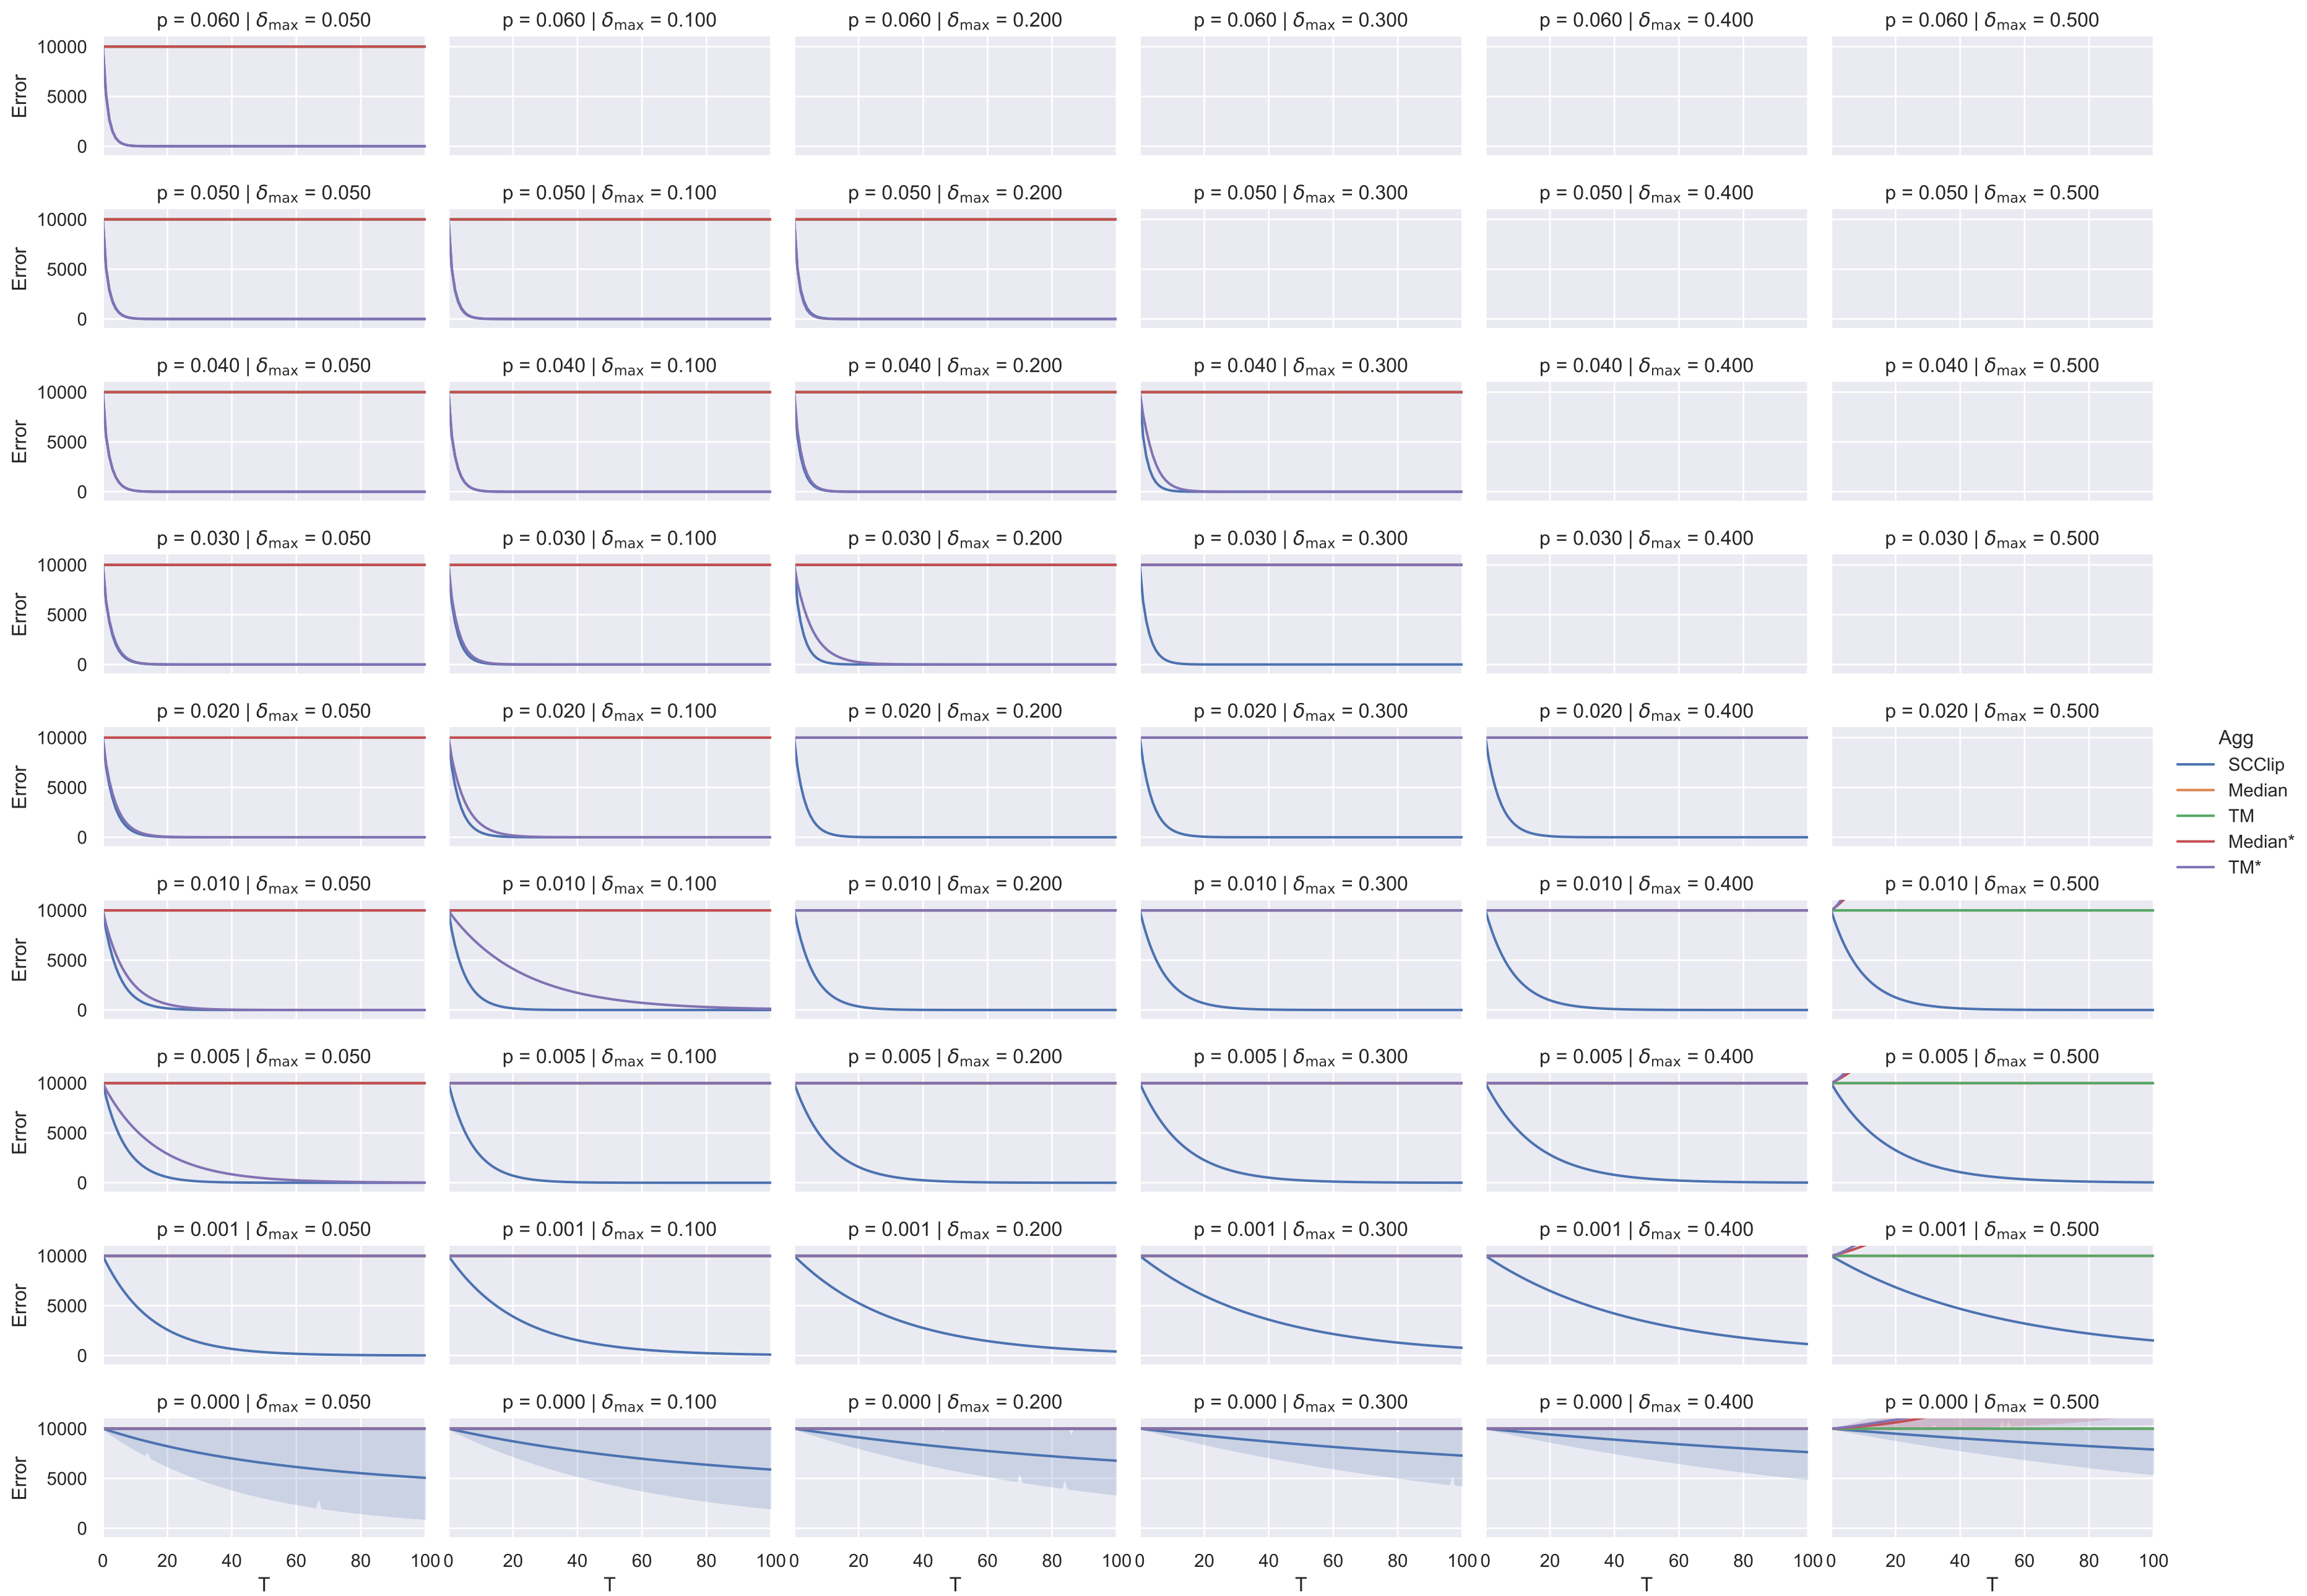

Supplement: supplementary_material [file attachment]

NonIID = False

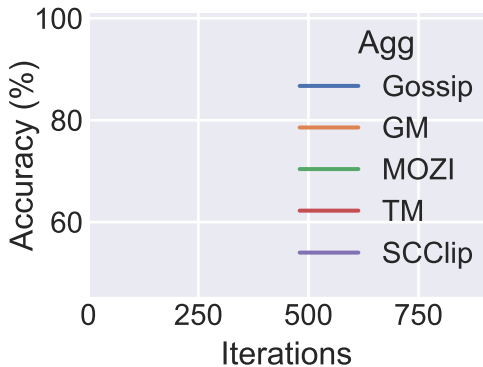

NonIID = True

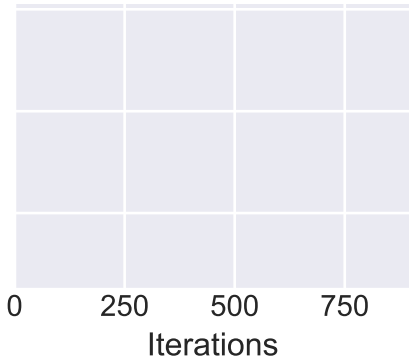

Supplement: supplementary_material [file attachment]

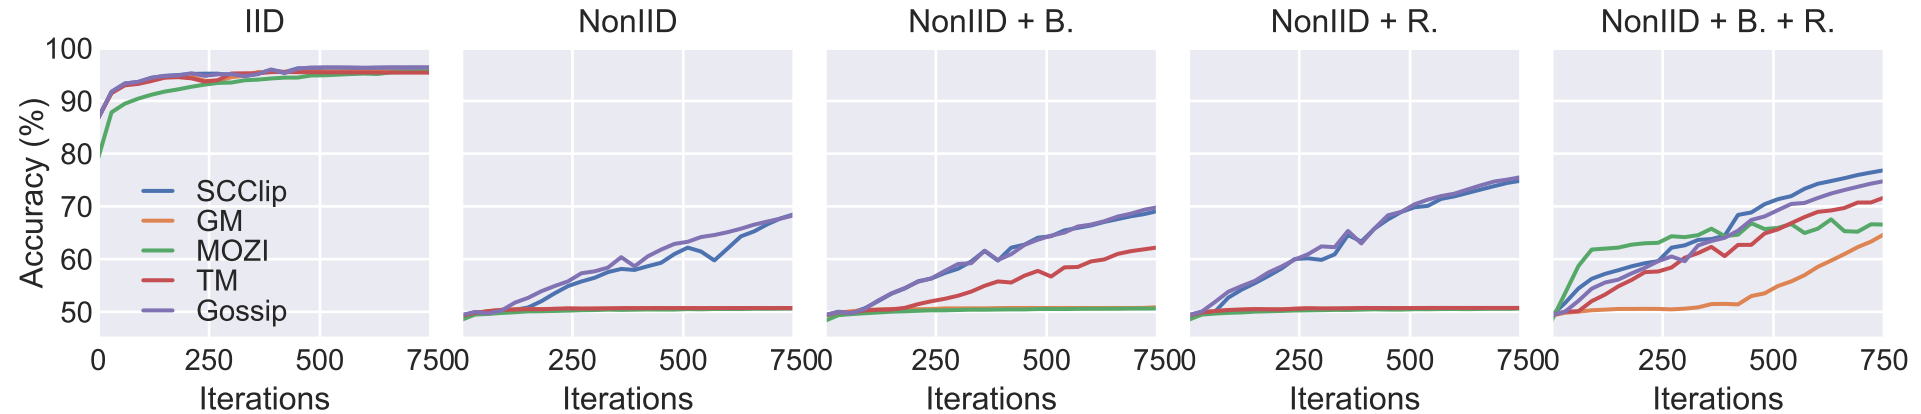

Supplement: supplementary_material [file attachment]

$\delta_{\max}$  — 0.0 — 0.0625 — 0.125 — 0.1875 — 0.25

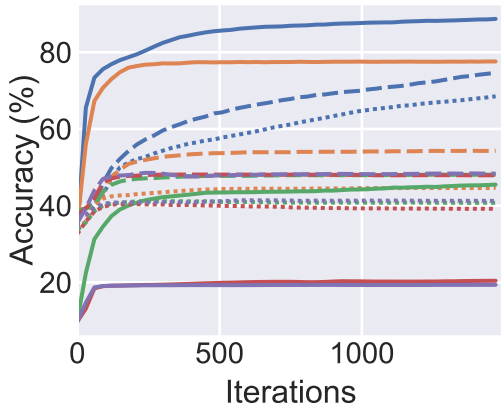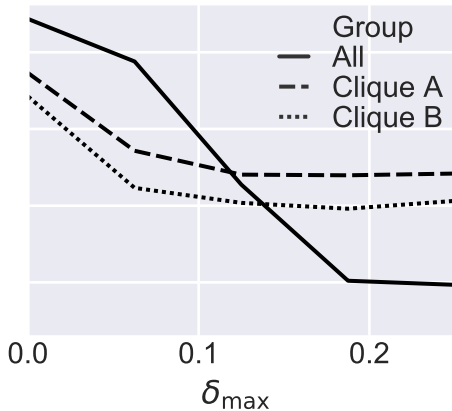

Supplement: supplementary_material [file attachment]

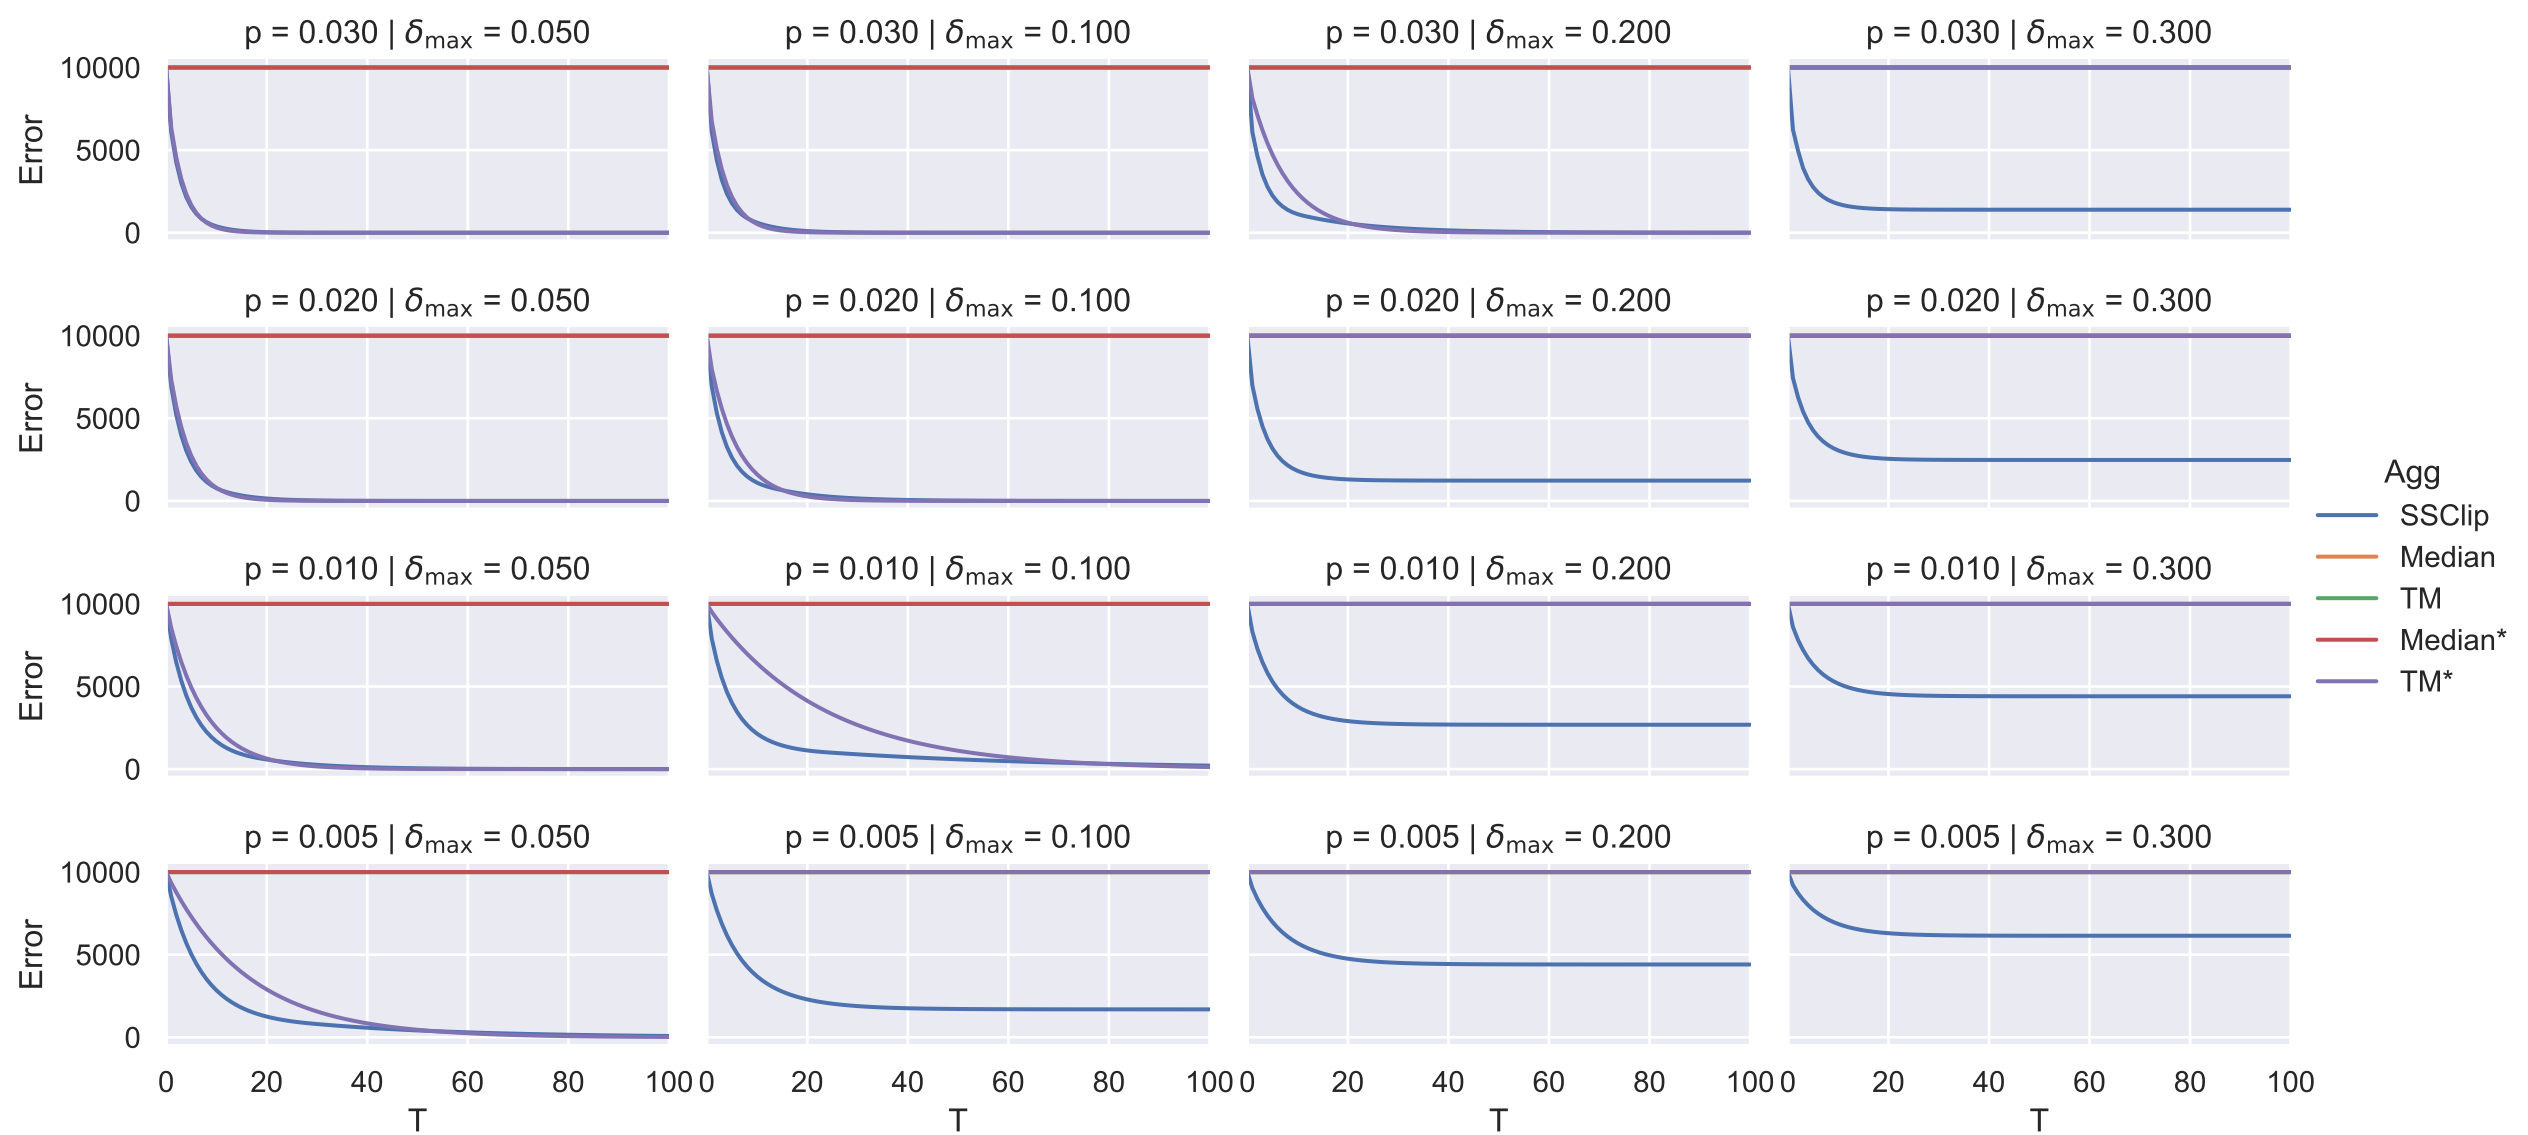

Supplement: supplementary_material [file attachment]

RandomEdge = False

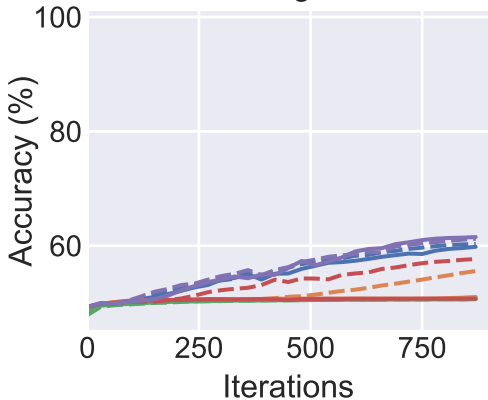

RandomEdge = True

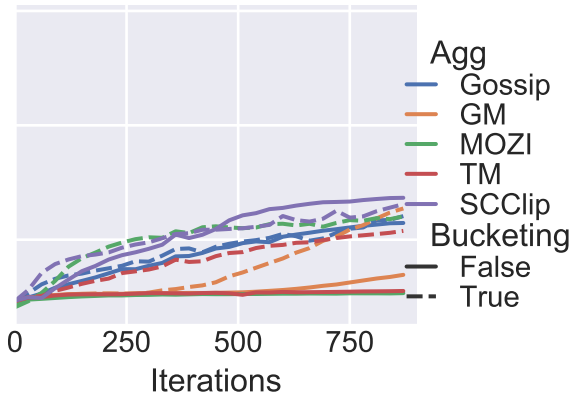

Supplement: supplementary_material [file attachment]

IID-Global

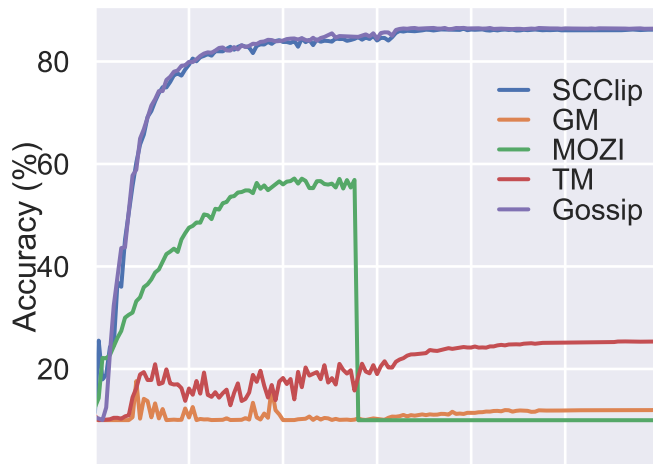

IID-Clique1

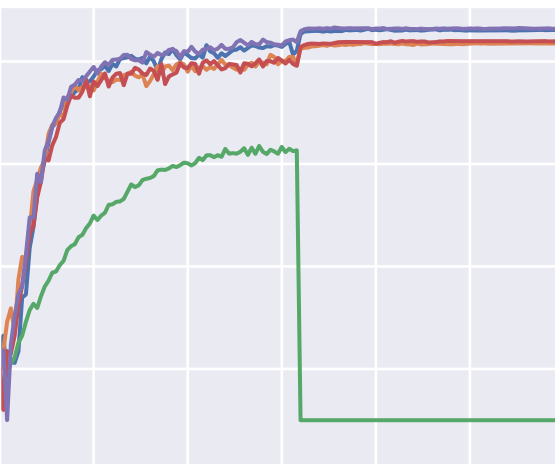

IID-Clique2

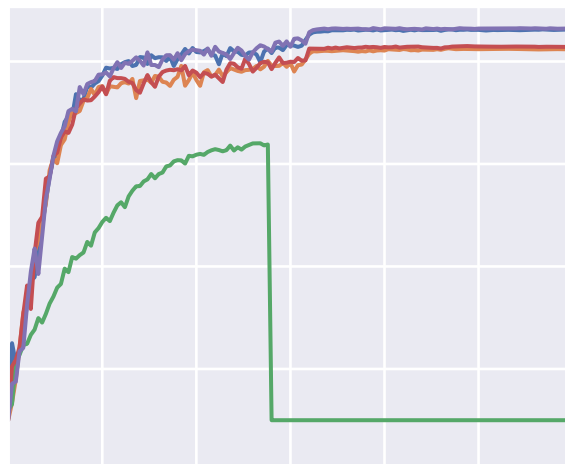

NonIID-Global

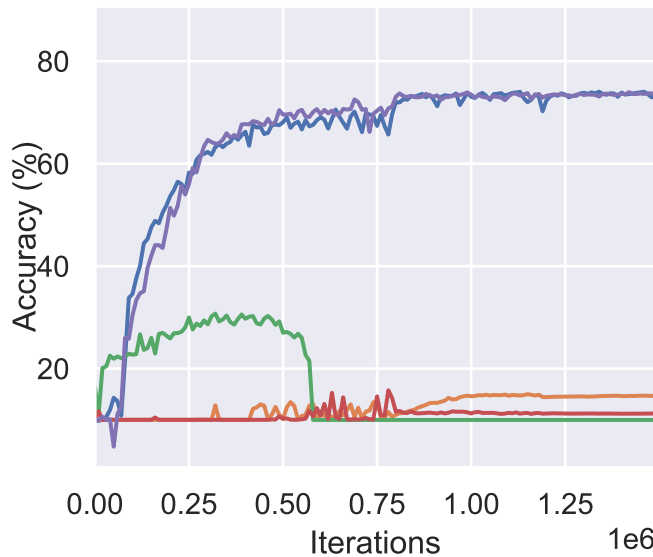

NonIID-Clique1

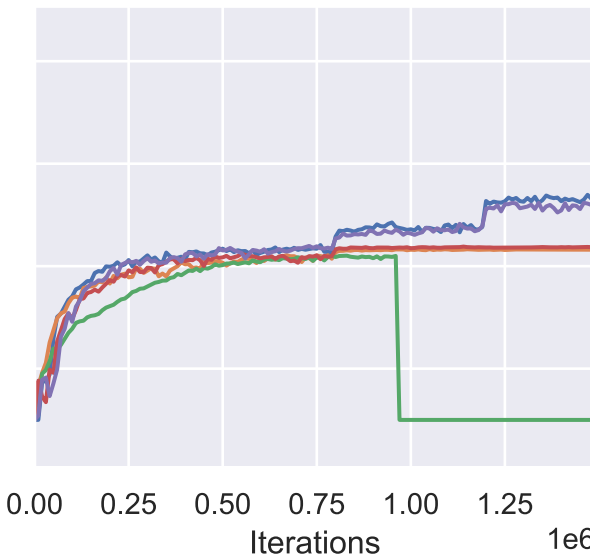

NonIID-Clique2

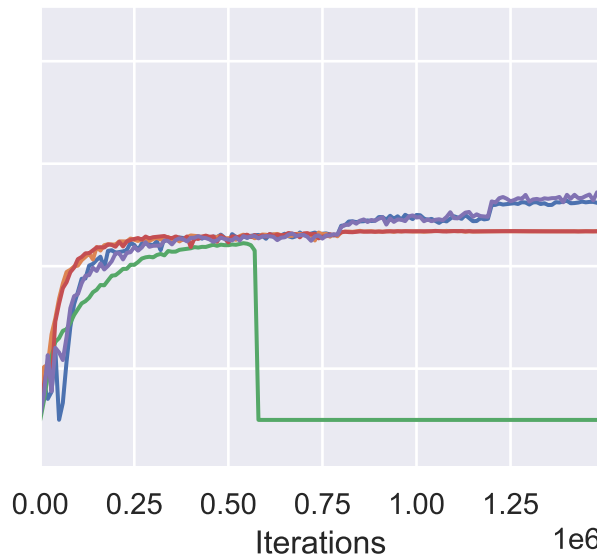

Supplement: supplementary_material [file attachment]

NonIID = False

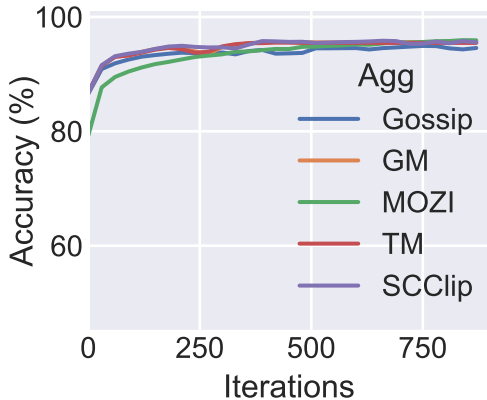

NonIID = True

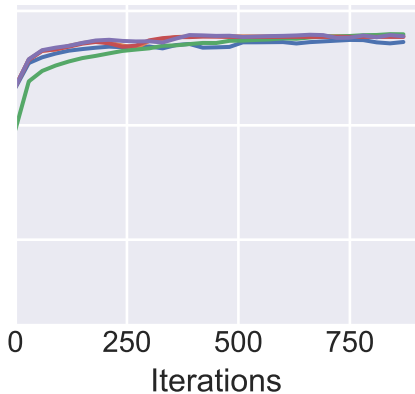

Supplement: supplementary_material [file attachment]

NonIID = False

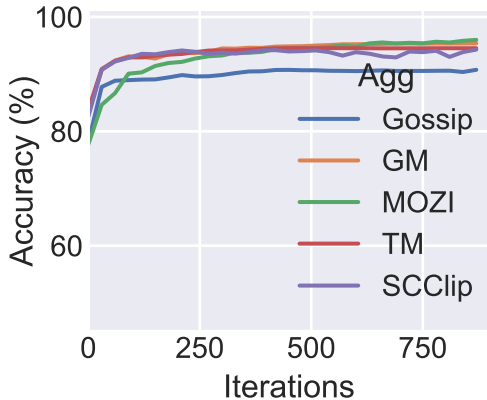

NonIID = True

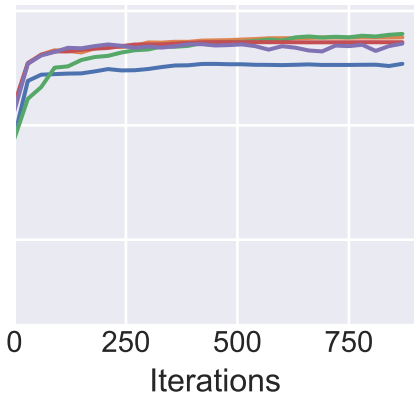

Supplement: supplementary_material [file attachment]

ATK = BF

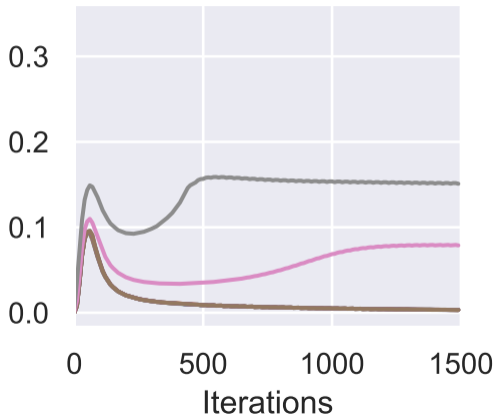

ATK = dissensus1.5

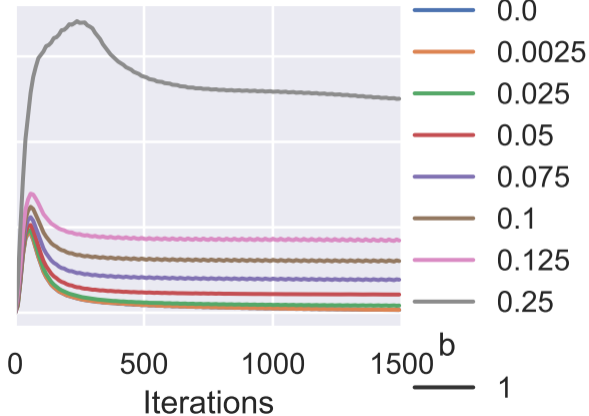

Supplement: supplementary_material [file attachment]

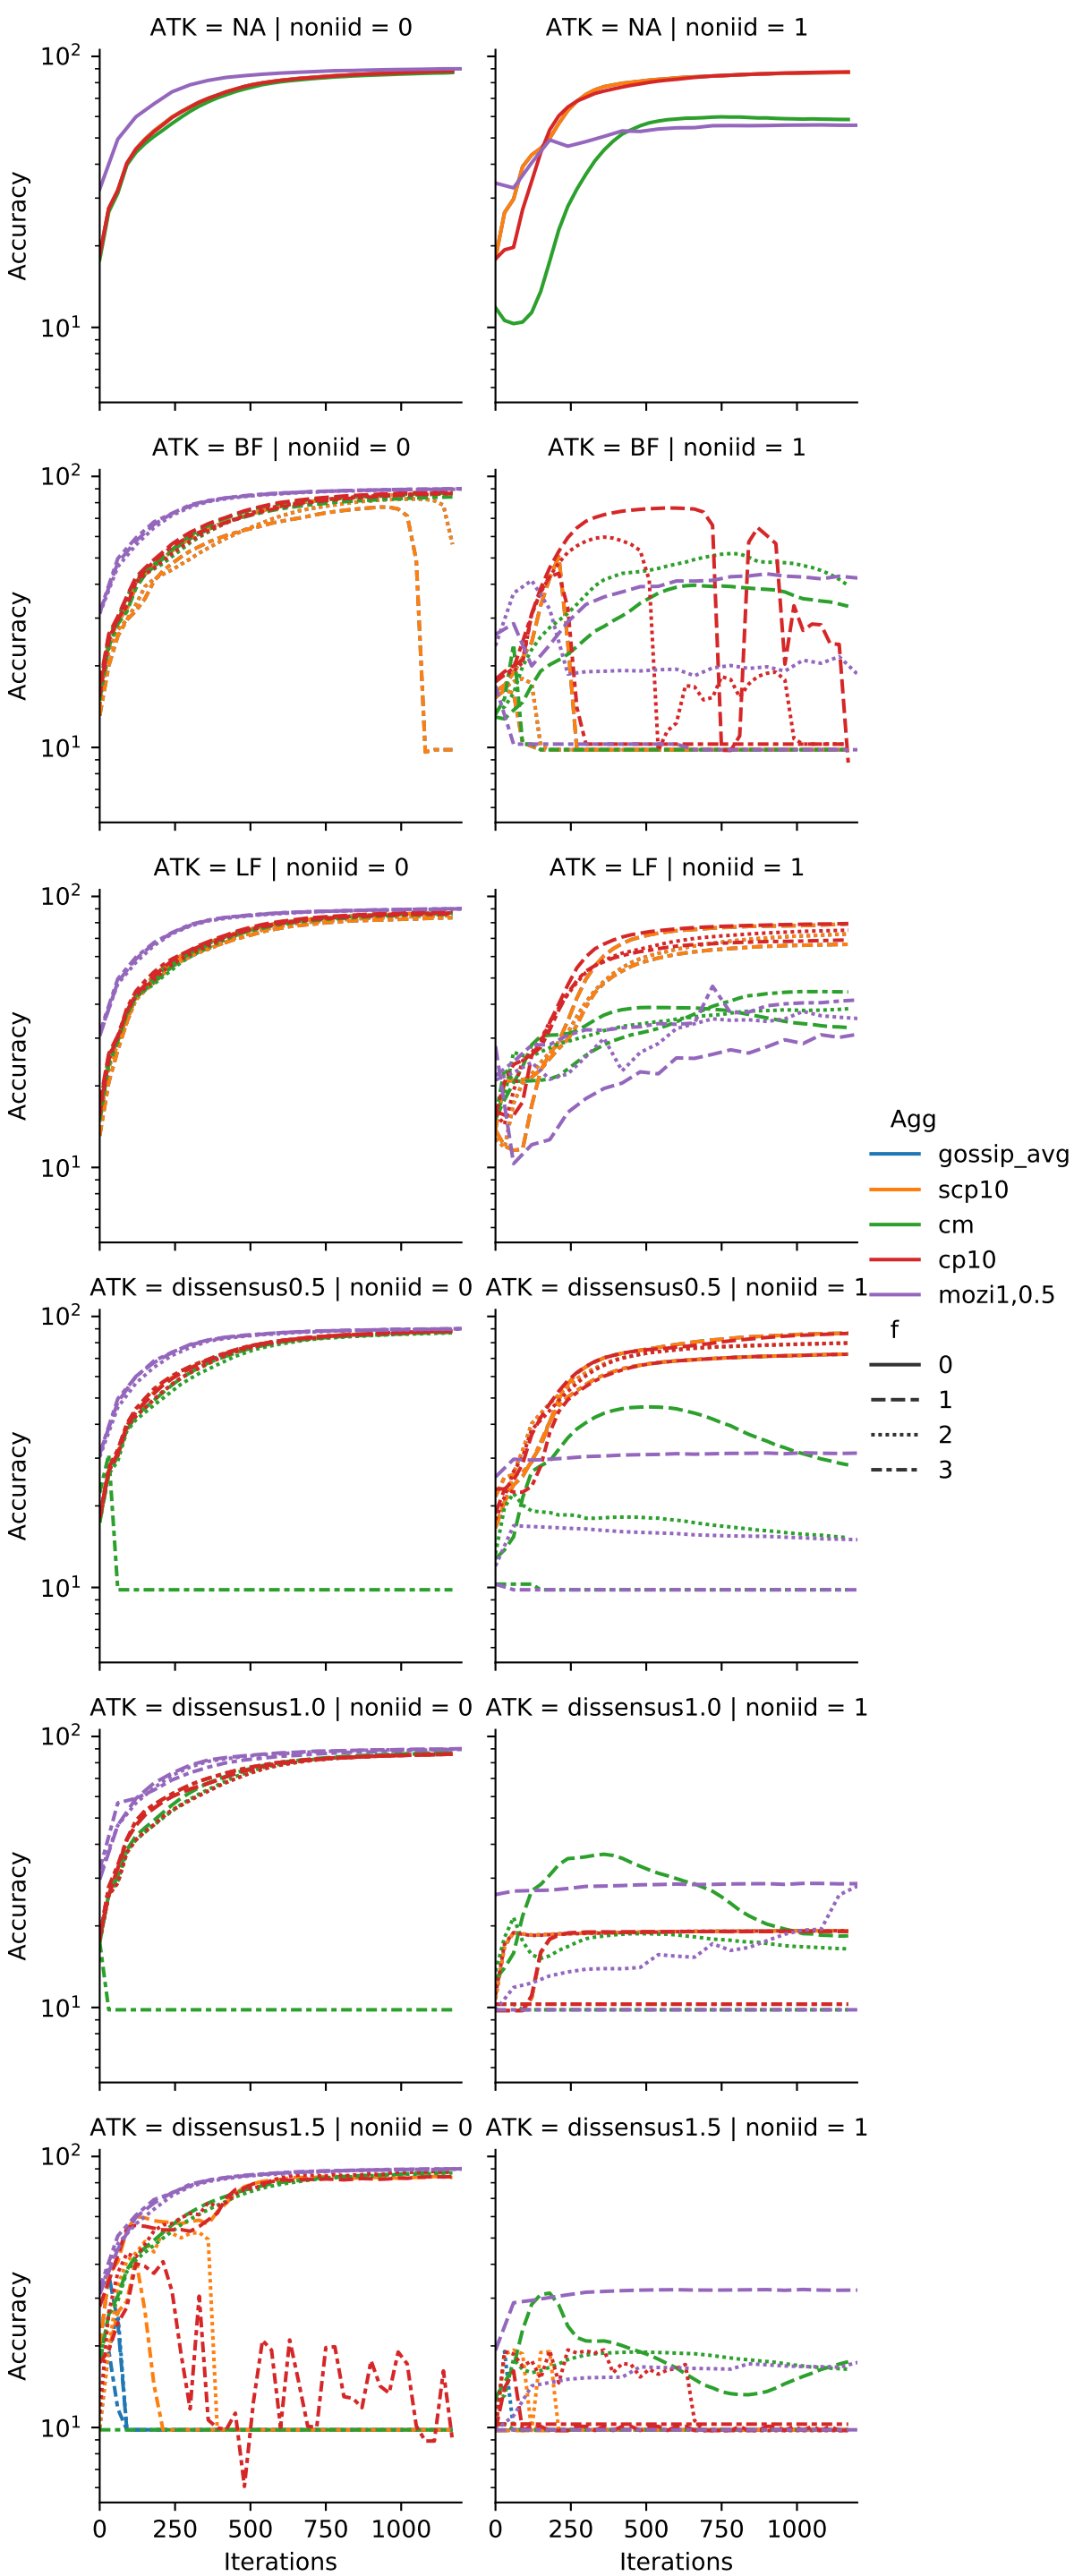

Supplement: supplementary_material [file attachment]

NonIID = False

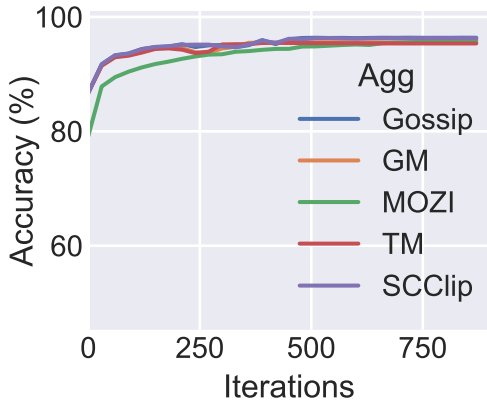

NonIID = True

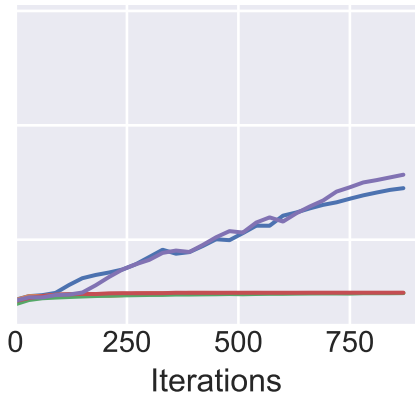

Supplement: supplementary_material [file attachment]

Error

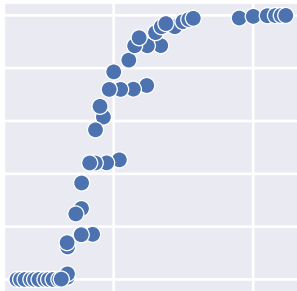

$\delta/p$

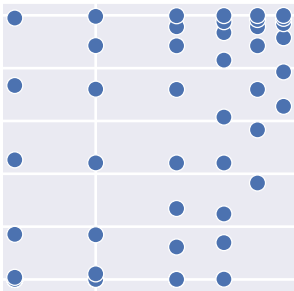

$\delta$

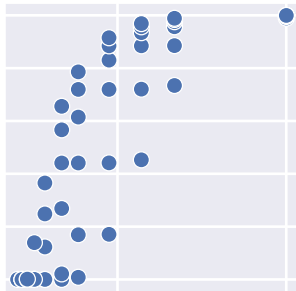

$1/p$

Supplement: supplementary_material [file attachment]

RandomEdge = False

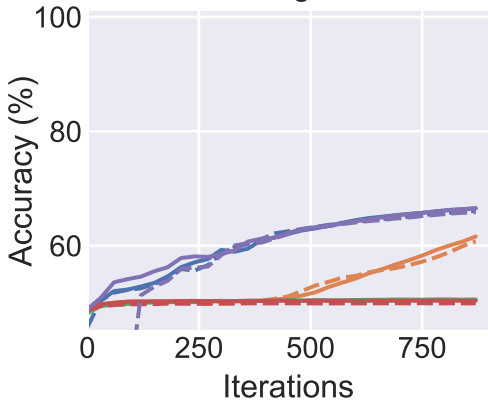

RandomEdge = True

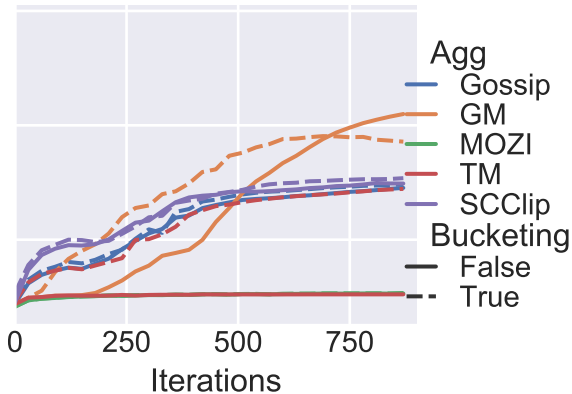

Supplement: supplementary_material [file attachment]

RandomEdge = False

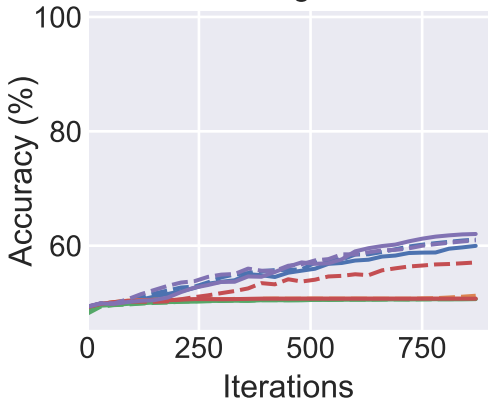

RandomEdge = True

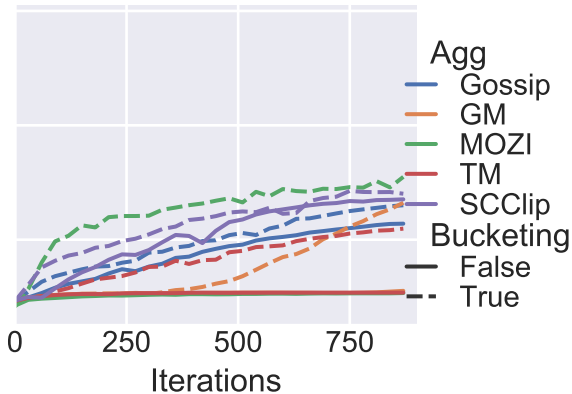

Supplement: supplementary_material [file attachment]

RandomEdge = False

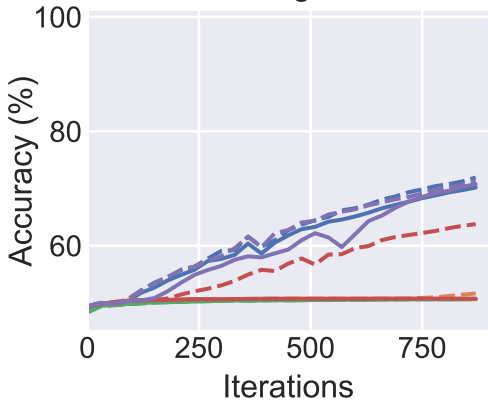

RandomEdge = True

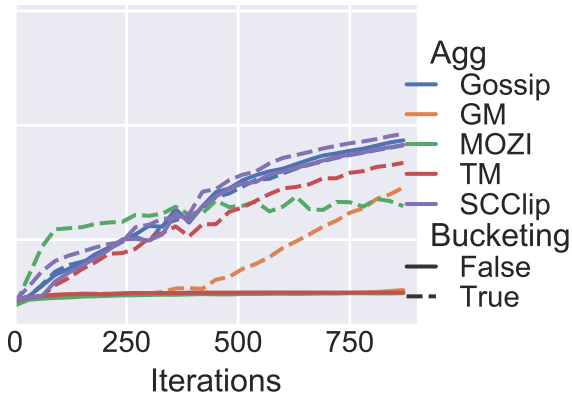

Supplement: supplementary_material [file attachment]

Error

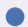

SCClip

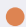

Median

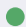

TM

0

$1/\gamma^2$

$\delta$

$\delta/\gamma^2$

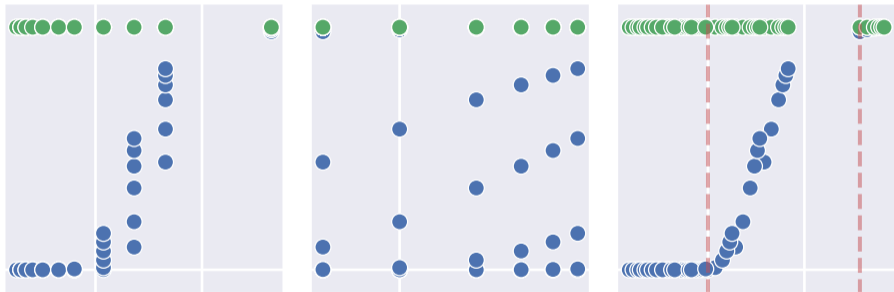

Supplement: supplementary_material [file attachment]

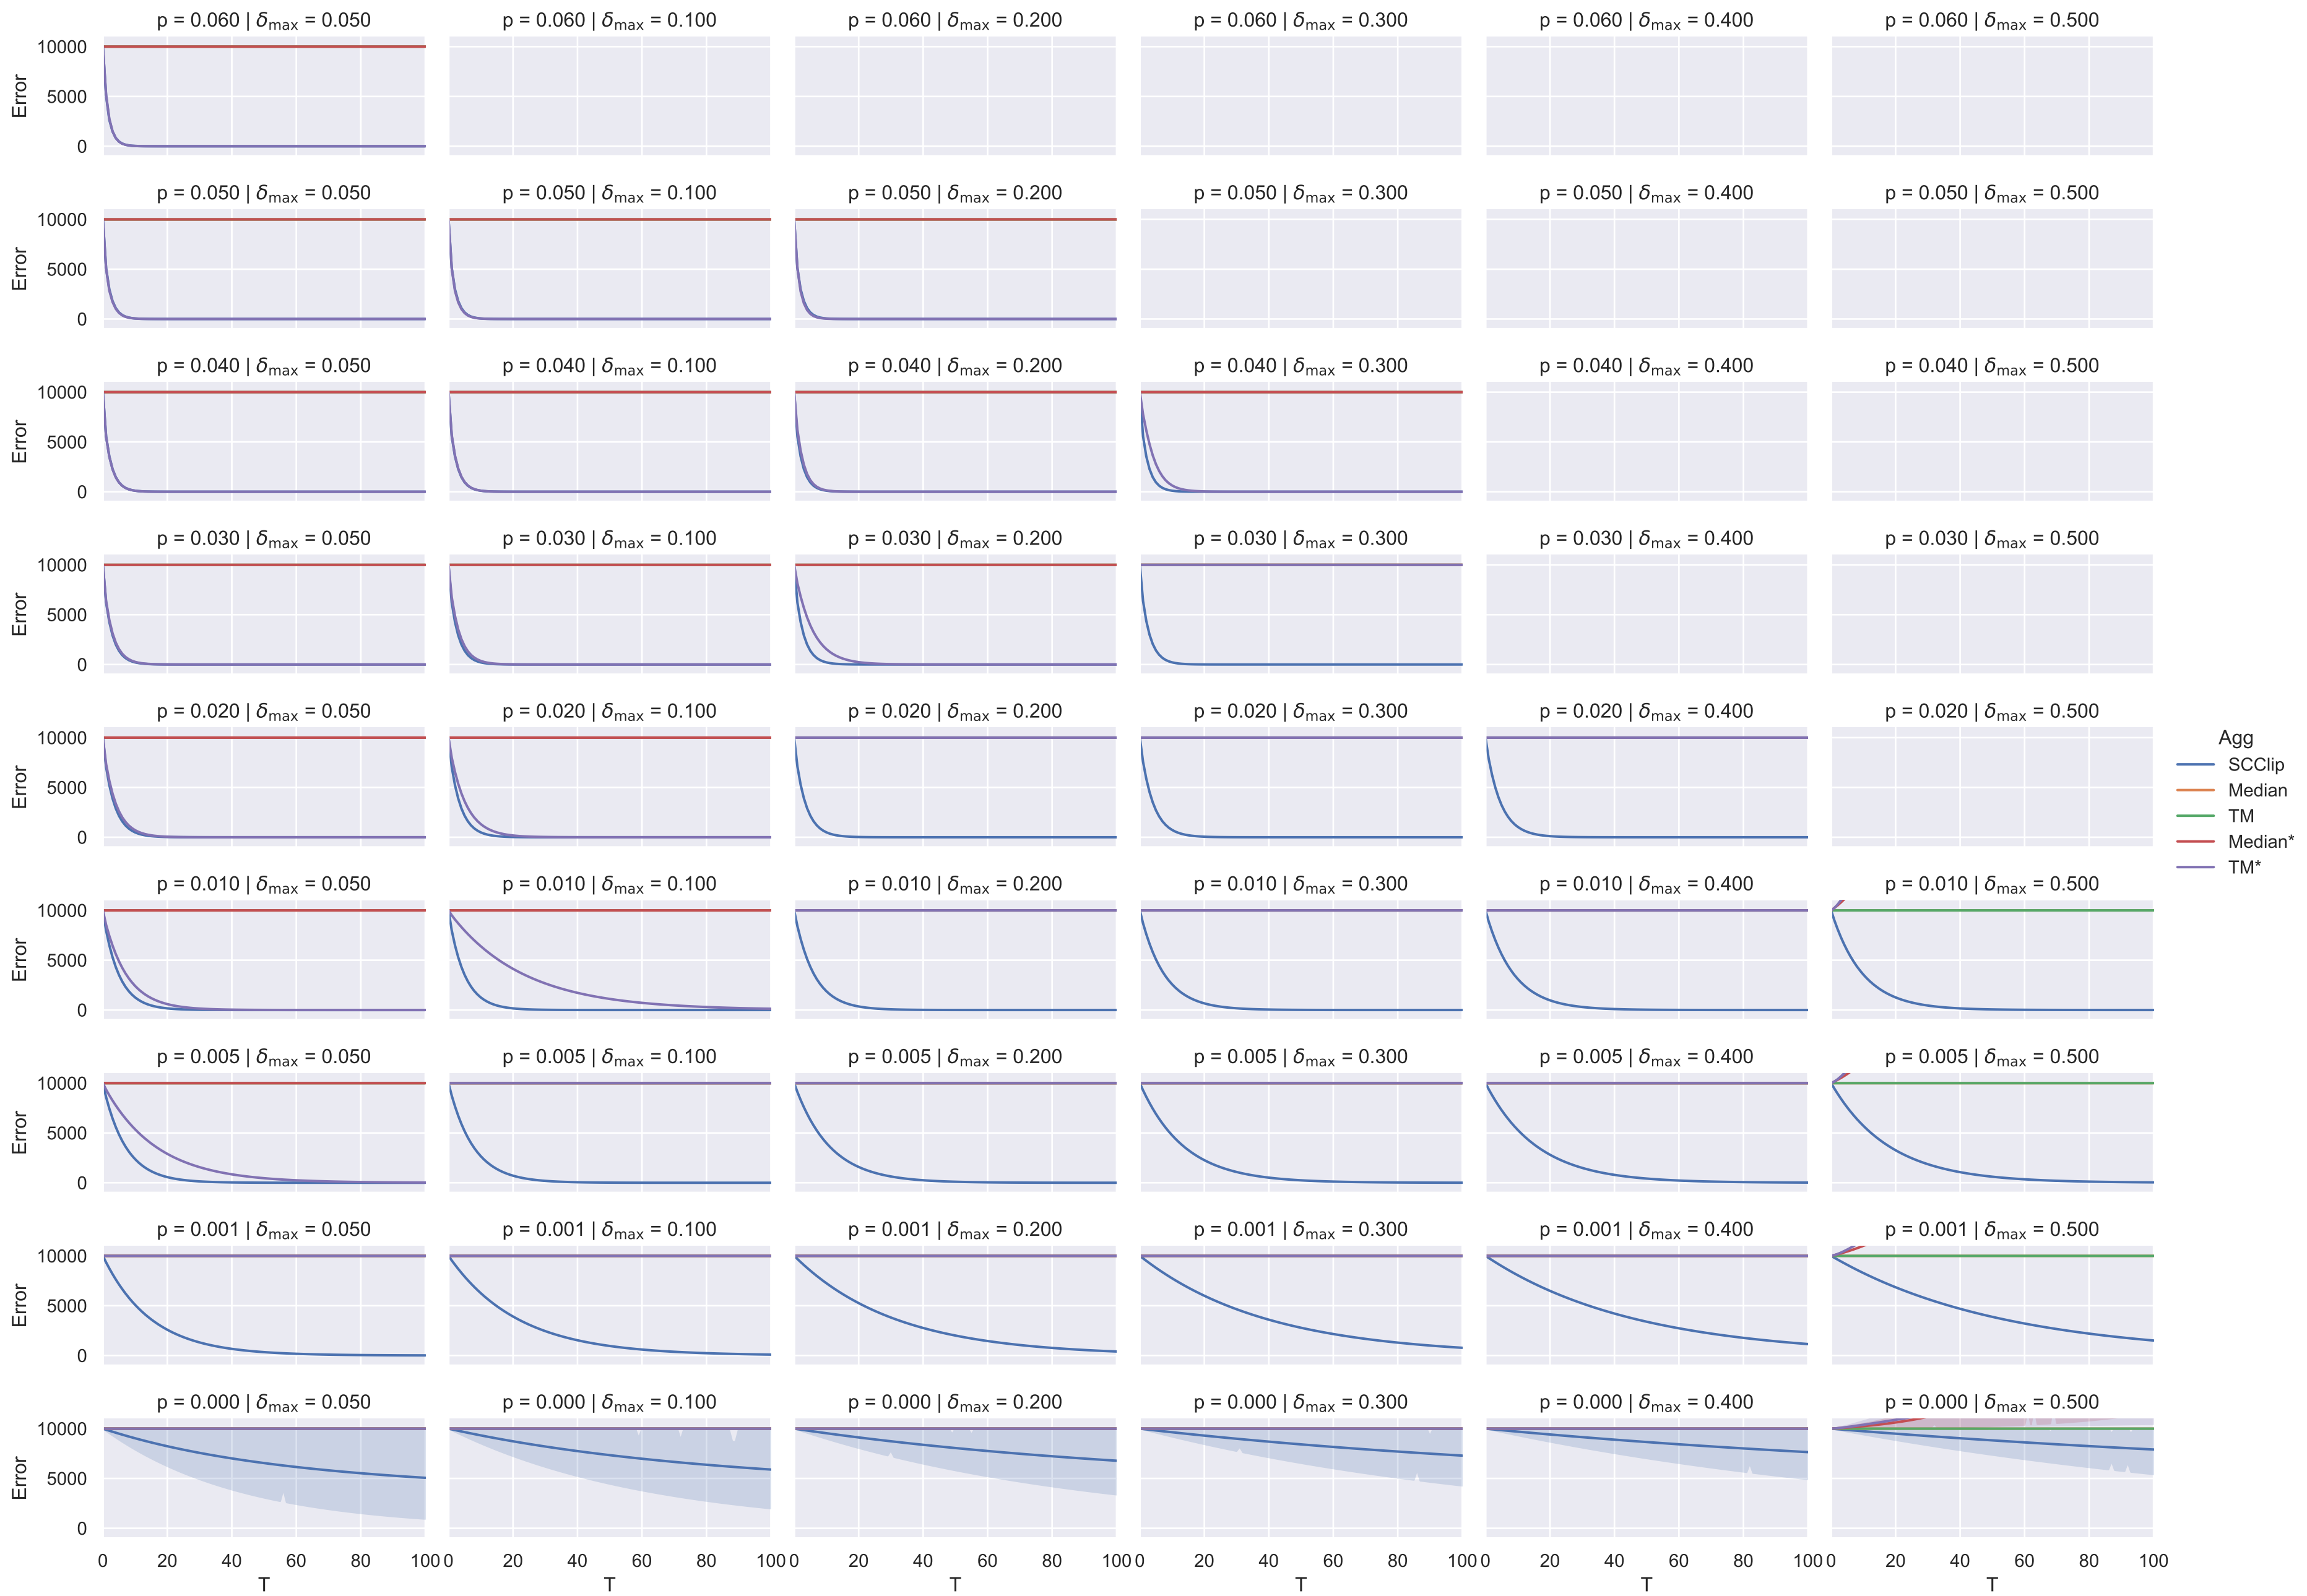

Supplement: supplementary_material [file attachment]

Agg — ClippedGossip — GM — TM  
 ATK = ALIE                      ATK = Dissensus

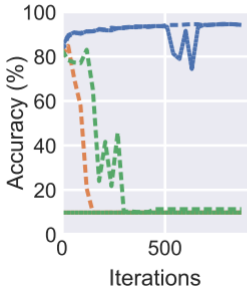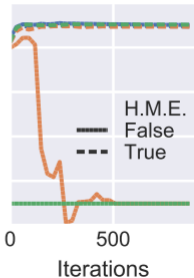

Supplement: supplementary_material [file attachment]
